# Supplementary material for: High-spin carbonyl complexes of iron(i) and cobalt(i)
Source: Royal Society of Chemistry journal article supplement (doi:10.1039/d1dt03924e), 2021-11-30
Supplement: d1dt03924e2.pdf [file d1dt03924e2.pdf]

## **High-Spin Carbonyl Complexes of Iron(I) and Cobalt(I)**

Christian Schneider, Lukas Guggolz, C. Gunnar Werncke

Philipps-Universität Marburg, Fachbereich Chemie, Hans-Meerwein-Straße 4, D-35032  
Marburg, Germany

## Table of Contents

|                                                           |    |
|-----------------------------------------------------------|----|
| IR Spectra.....                                           | 1  |
| UV/VIS Spectra .....                                      | 3  |
| NMR spectra.....                                          | 4  |
| Magnetic susceptibility measurements .....                | 5  |
| Quantum chemical studies.....                             | 8  |
| X-Ray diffraction analysis and molecular structures ..... | 12 |
| References.....                                           | 15 |

## IR Spectra

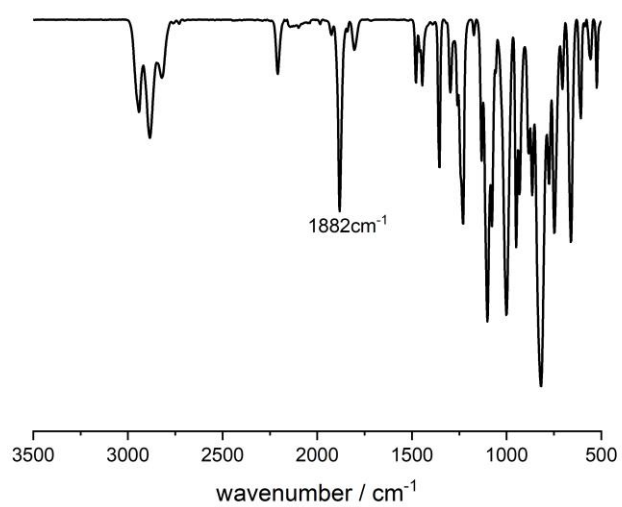

**Figure S1.** ATR IR spectrum of solid K{2.2.2crypt}[Co(CO)(hmds)<sub>2</sub>], K{2.2.2crypt}[1].

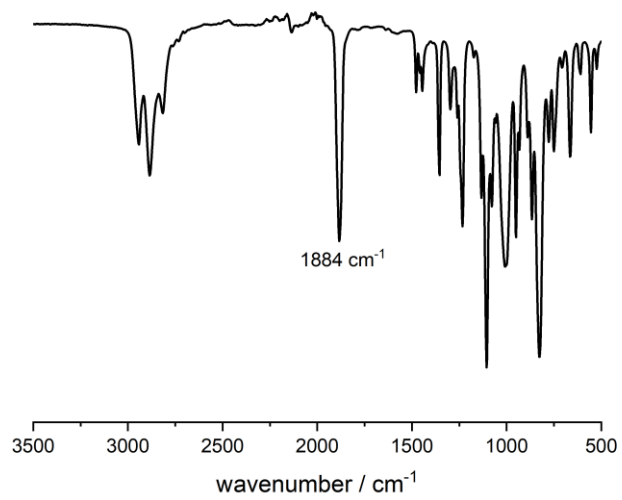

**Figure S2.** ATR IR spectrum of solid K{18c6}[Co(CO)(hmds)<sub>2</sub>], K{18c6}[1].

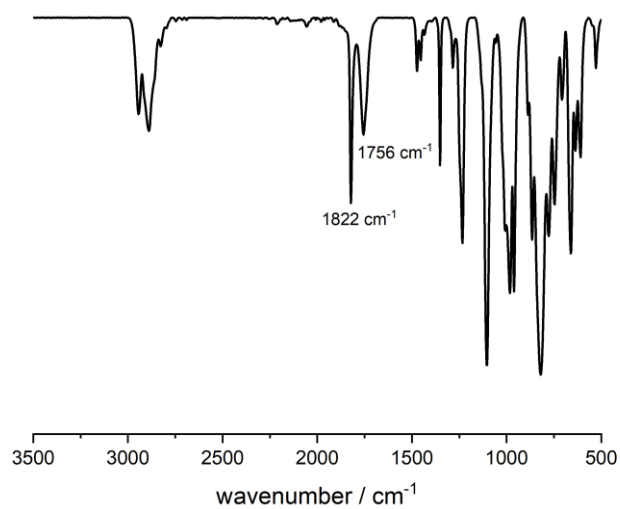

**Figure S3.** ATR IR spectrum of solid  $\text{K}\{18\text{c}6\}[\text{Fe}(\text{CO})(\text{hmds})_2]$ ,  $\text{K}\{18\text{c}6\}[\mathbf{2}]$ . The band  $1822\text{ cm}^{-1}$  is attributed to  $\text{K}\{18\text{c}6\}[\mathbf{2}]$ , whereas the signal at  $1756\text{ cm}^{-1}$  belongs to an unknown secondary product (presumably  $[\text{Fe}(\text{CO})_4]^{2-}$ ).

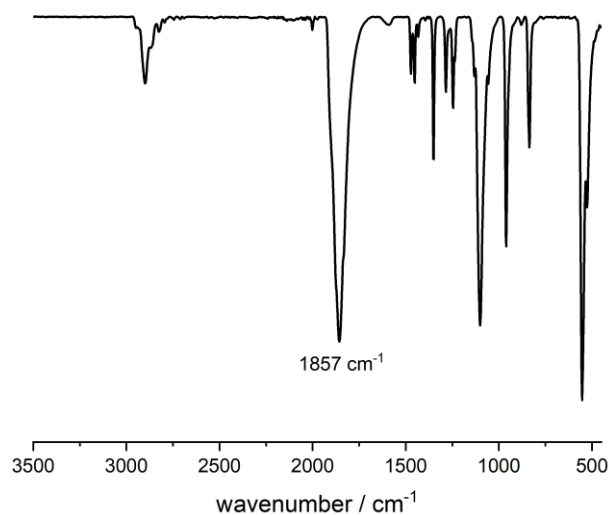

**Figure S4.** ATR IR spectrum of solid  $\text{K}\{18\text{c}6\}[\text{Co}(\text{CO})_4]$ ,  $\text{K}\{18\text{c}6\}[\mathbf{3}]$ .

## UV/VIS Spectra

The UV/VIS spectra were recorded on an *Analytik Jena Specord S600* spectrometer equipped with *UNISOKU CoolSpeK Cryostat*, using the WinASPECT software.

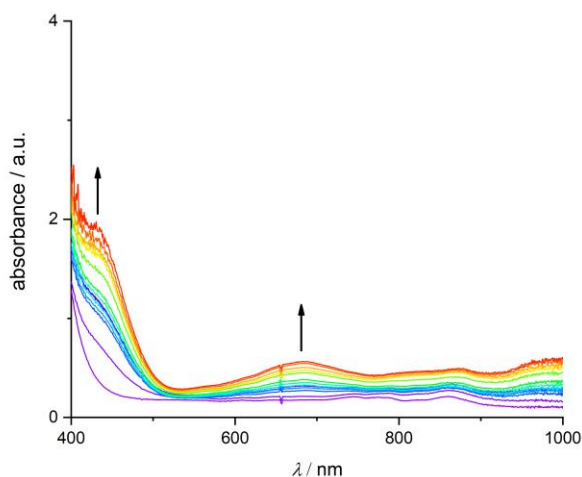

**Figure S5.** *In situ* UV/Vis spectra of the reaction of  $\text{K}\{18\text{c}6\}[\text{Co}(\text{hmds})_2]$  with slight stoichiometric excess CO  $-80\text{ }^\circ\text{C}$  in  $\text{Et}_2\text{O}$ . The arrows show bands at 430 nm and 638 nm which are attributed to  $\text{K}\{18\text{c}6\}[\mathbf{1}]$ . To monitor the formation a spectrum was recorded every 40 seconds. The arrows show the direction of band evolution.

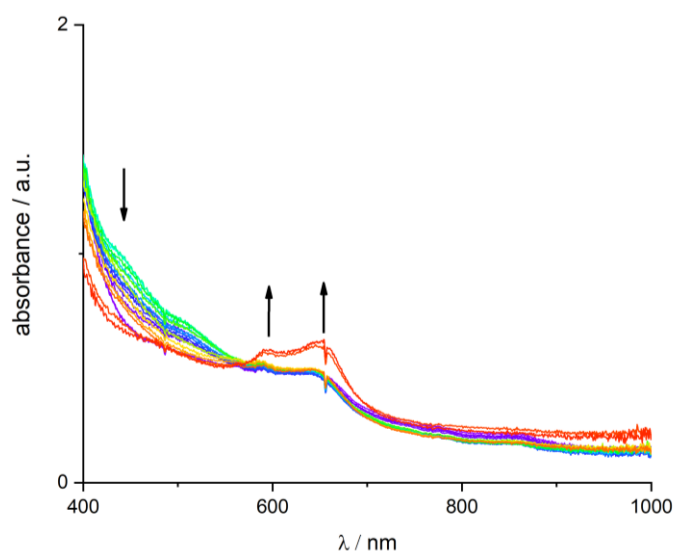

**Figure S6.** *In situ* UV/Vis spectra of the reaction of  $\text{K}\{18\text{c}6\}[\text{Co}(\text{hmds})_2]$  with slight stoichiometric excess CO  $-80\text{ }^\circ\text{C}$  in THF. The lack of a resolved band at 430 nm indicates the absence of  $\text{K}\{m\}[\mathbf{1}]$ . The features at 590 and 660 nm resemble the ones observed for  $[\mathbf{3}]^-$  (see Figure S7). To monitor the reaction a spectrum was recorded every 30 seconds. The arrows show the direction of band evolution.

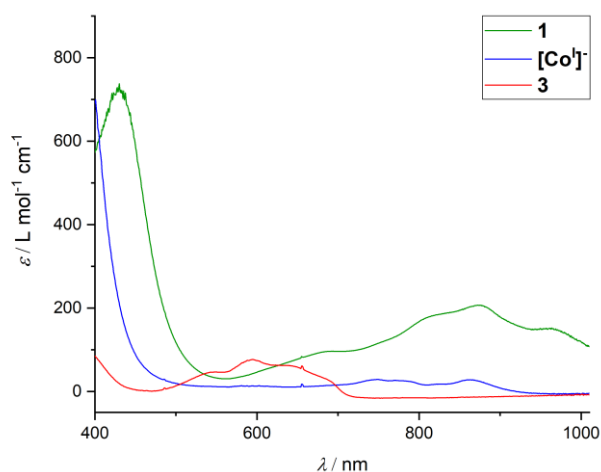

**Figure S7.** Overlay of the room temperature UV/VIS spectra of pristine  $K\{m\}[1]$  (green),  $K\{18c6\}[\text{Co}(\text{hmds})_2]$  (blue) and  $K\{18c6\}[3]$  (red) dissolved in  $\text{Et}_2\text{O}$ . The spectrum of  $K\{m\}[1]$  shows decomposition as evidenced by pronounced bands above 700 nm in comparison with the signature attributed to in-situ formed  $K\{m\}[1]$  (see figure S5).

### NMR spectra

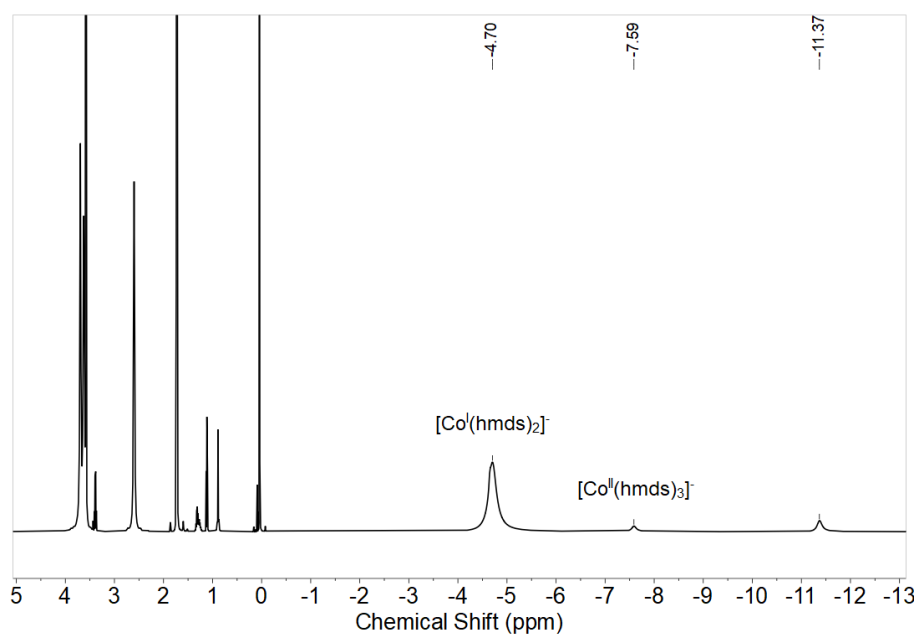

**Figure S8.**  $^1\text{H}$ -NMR-spectrum of isolated  $K\{2.2.2.\text{crypt}\}[1]$  dissolved in  $\text{THF-d}_8$  showing only the  $[\text{Co}^I]$  starting complex, as well as minor amounts of  $[\text{Co}^{II}(\text{hmds})_3]^-$  decomposition product as well as an unknown species at -11.37 ppm.

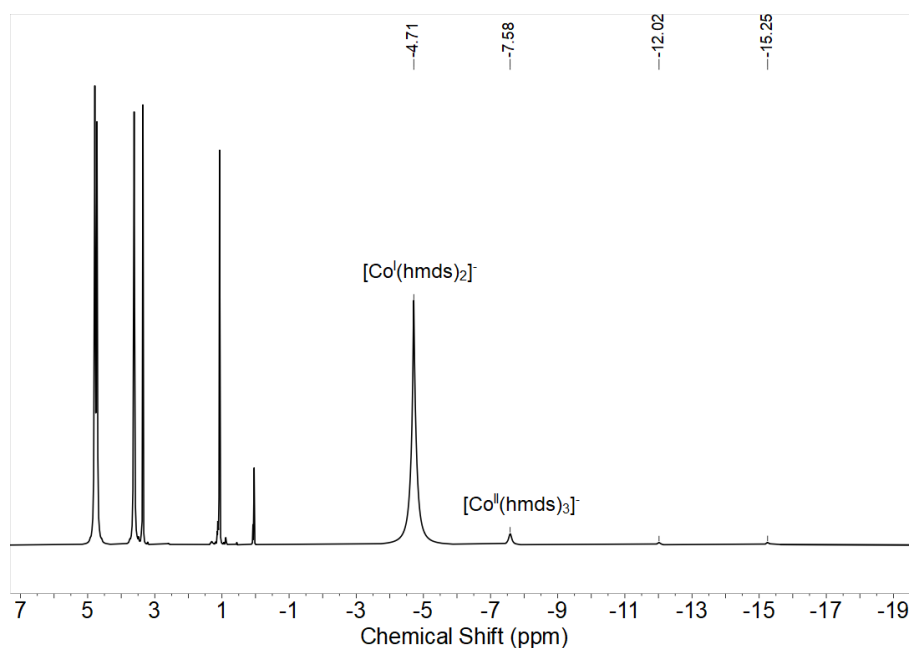

**Figure S9.**  $^1\text{H}$ -NMR-spectrum of  $\text{K}\{2.2.2\text{crypt}\}[\mathbf{1}]$  in  $\text{Et}_2\text{O}-d_{10}$  showing only the  $[\text{Co}^{\text{I}}]$  starting complex, the  $[\text{Co}^{\text{II}}(\text{hmds}_3)]^-$  decomposition product as well as minor unknown species at  $-12.02$  and  $-15.25$  ppm.

### Magnetic susceptibility measurements

Temperature-dependent magnetic DC susceptibility measurements were carried out with a *Quantum-Design Dynacool* PPMS system in the range from 295/300 to 3.0 K at a magnetic field of 0.1; 1.0 and 9.0 T. A powdered sample of  $\text{K}\{18\text{c}6\}[\mathbf{1}]$  was capsuled in an polyurethane sample holder. The Magnetic moments of each raw data set were corrected according to the diamagnetic contribution of the sample holder and the sample using pascal constants<sup>[1]</sup>, as well as the experimentally determined magnetic moment of the sample holder. Experimental  $c_{\text{M}}T$  vs.  $T$  data were modelled by Dr. S. Demeshko (University Göttingen) using a fitting procedure to the following spin Hamiltonian for one cobalt(I)  $S = 1$  ion with Zeeman splitting and zero-field splitting:

$$\hat{H} = \mu_{\text{B}} \vec{B} \mathbf{g} \vec{S} + D \left[ S_z^2 - \frac{1}{3} S(S+1) \right]$$

Full-matrix diagonalization of the spin Hamiltonian was performed with the *julX\_2s* program (E. Bill, Max-Planck Institute for Chemical Energy Conversion, Mülheim/Ruhr, Germany, **2014**). Matrix diagonalization is done with the routine ZHEEV from the LAPACK numerical package. Parameter optimization is performed with the simplex routine AMOEBA from NUMERICAL RECIPES. Temperature-independent paramagnetism (*TIP*) of  $906 \cdot 10^{-6} \text{ cm}^3 \text{ mol}^{-1}$  was included according to  $\chi_{\text{calc}} = \chi + \text{TIP}$ .

Alternatively the paramagnetic susceptibilities were fitted with the Curie-Weiss-law  $\chi_{\text{CW}} = \left( \frac{N_A \mu_{\text{B}}^2 n_{\text{eff}}}{3k_{\text{B}}} \right)^2 \frac{1}{T-\theta}$ , with  $\chi_{\text{para}} T = (\chi_{\text{TIP}} + \chi_{\text{CW}}) T$ .

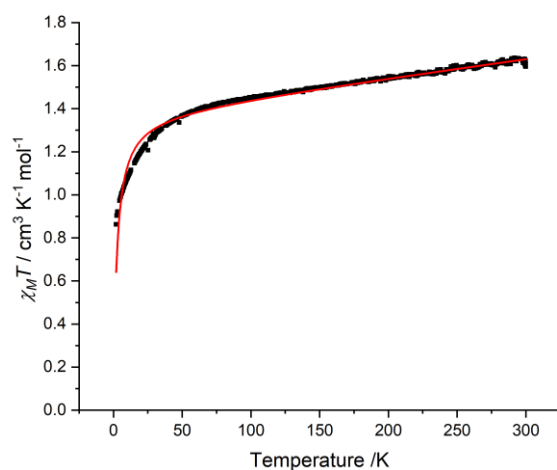

**Figure S10.** Plot of  $\chi_M T$  vs. temperature for  $K\{18c6\}[1]$  with an applied field  $B = 0.1$  T.  $\mu_{eff} = 3.32 \mu_B$  (300 K;  $\mu_{S.O.} = 2.82 \mu_B$ ),  $\theta = -2,36$  K.

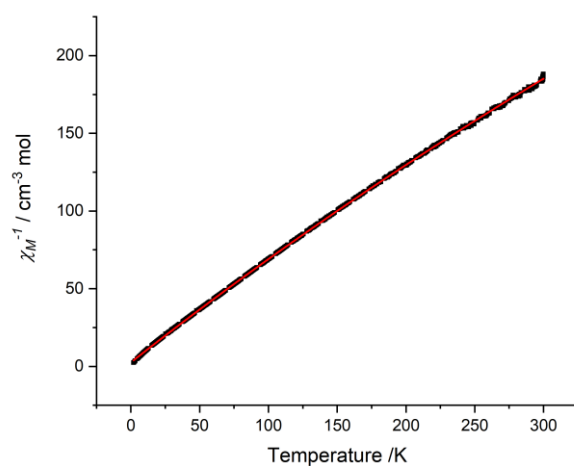

**Figure S11.** Temperature dependence of reciprocal molar magnetic susceptibility  $\chi^{-1}$  of  $K\{18c6\}[1]$  with an applied field of  $B = 0.1$  T.



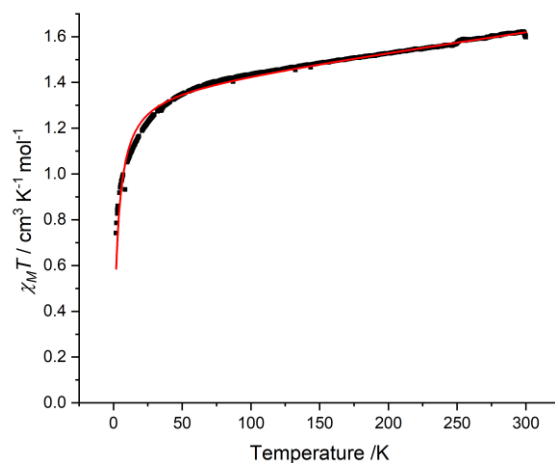

**Figure S12.** Plot of  $\chi_M T$  vs. temperature for  $K\{18c6\}[1]$  with an applied field  $B = 1.0$  T.  $\mu_{eff} = 3.31 \mu_B$  (300 K;  $\mu_{s.o.} = 2.82 \mu_B$ ),  $\theta = -2,75$  K.

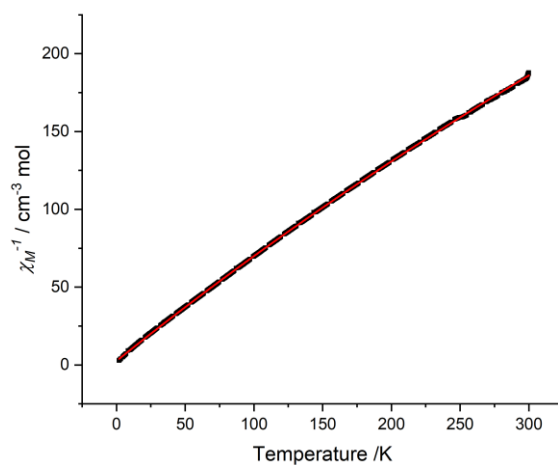

**Figure S13.** Temperature dependence of reciprocal molar magnetic susceptibility  $\chi^{-1}$  of  $K\{18c6\}[1]$  with an applied field of  $B = 1.0$  T.

## Quantum chemical studies

All calculations were performed according to the specifications given in the experimental section in the manuscript. For compound  $[2]^-$  we calculated both the high-spin and the low-spin state. The calculations were done without any symmetry restrictions. The differences between the calculated energy values given in Tables S5 and S6 can be attributed to the different approaches of the respective functionals: B97-D is a generalized gradient approximation (GGA) functional, while PBE0 and B3-LYP are hybrid functionals. Despite these differences, the calculated values add to the bigger picture and help to explain the experimental findings.

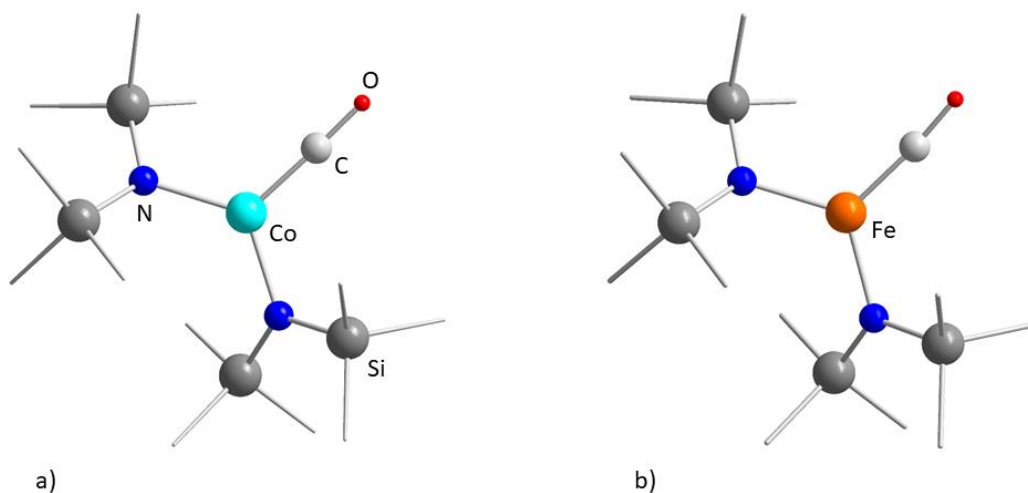

**Figure S14.** Computationally optimized molecular structures of a) complex  $[1]^-$  and b) complex  $[2]^-$  (high-spin). H atoms are omitted for clarity. The bond lengths and angles are given in Table 2 of the manuscript.

**Table S1.** Partial charges calculated by means of natural population analysis (NPA). The values for N and Si are averaged, due to the calculations being done without symmetry restrictions.

|                 | $[1]^-$ (hs) | $[2]^-$ (hs) | $[2]^-$ (ls) |
|-----------------|--------------|--------------|--------------|
| Co              | +0.77        | ---          | ---          |
| Fe              | ---          | +0.95        | +0.41        |
| N               | -1.72        | -1.73        | -1.59        |
| C <sub>Co</sub> | +0.28        | +0.18        | +0.44        |
| O               | -0.58        | -0.61        | -0.66        |
| Si              | +1.85        | +1.84        | -1.84        |

**Table S2.** Average atomic populations from spin density, calculated by means of NPA.

|                 | [1] <sup>-</sup> (hs) | [2] <sup>-</sup> (hs) | [2] <sup>-</sup> (ls) |
|-----------------|-----------------------|-----------------------|-----------------------|
| Co              | 1.93                  | ---                   | ---                   |
| Fe              | ---                   | 3.10                  | 1.26                  |
| C <sub>CO</sub> | -0.14                 | -0.24                 | -0.22                 |
| O               | -0.06                 | -0.10                 | -0.05                 |
| N               | 0.11                  | 0.08                  | 0.00                  |
| Si              | 0.00                  | 0.00                  | 0.00                  |
| C <sub>CH</sub> | 0.00                  | 0.00                  | 0.00                  |
| H               | 0.00                  | 0.00                  | 0.00                  |

**Table S3.** Calculated shared electron numbers (SEN) of the respective M–C bonds and of a C–H bond as a comparison. Note that SEN are not absolute measures for the actual bond strength, but can be used to show trends.

|      | [1] <sup>-</sup> (hs) | [2] <sup>-</sup> (hs) | [2] <sup>-</sup> (ls) |
|------|-----------------------|-----------------------|-----------------------|
| Co–C | 0.61                  | ---                   | ---                   |
| Fe–C | ---                   | 0.68                  | 1.00                  |
| C–H  | 1.37                  | 1.37                  | 1.37                  |

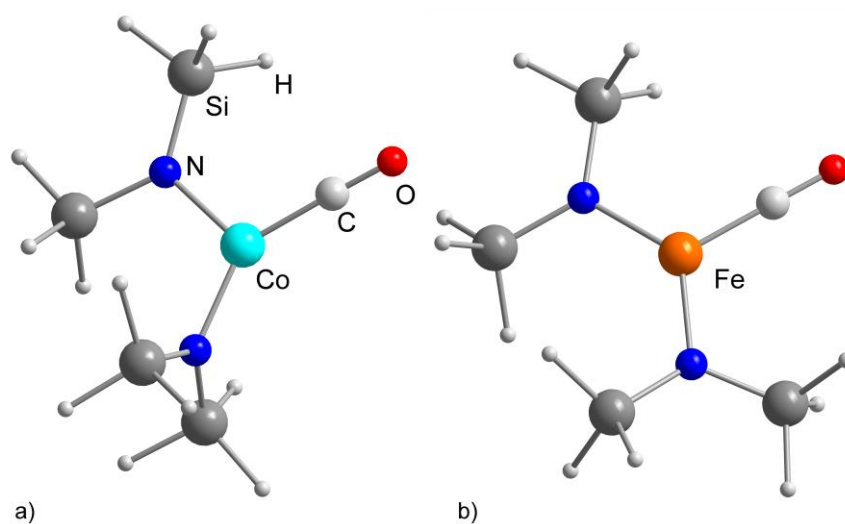

**Figure S15.** Computationally optimized molecular structures of **a)** complex  $[\text{Co}(\text{CO})\{\text{N}(\text{SiH}_3)_2\}_2]^-$  and **b)**  $[\text{Fe}(\text{CO})\{\text{N}(\text{SiH}_3)_2\}_2]^-$  (high-spin). The bond lengths and angles are given in Table S4.

**Table S4.** Calculated bond lengths (Å) and angles (°) of  $[\text{Co}(\text{CO})(\text{N}(\text{SiH}_3)_2)_2]^-$  and  $[\text{Fe}(\text{CO})(\text{N}(\text{SiH}_3)_2)_2]^-$ .

|         | $[\text{Co}(\text{CO})(\text{N}(\text{SiH}_3)_2)_2]^-$ | $[\text{Fe}(\text{CO})(\text{N}(\text{SiH}_3)_2)_2]^-$ |
|---------|--------------------------------------------------------|--------------------------------------------------------|
| M–N1    | 1.95                                                   | 1.97                                                   |
| M–N2    | 1.94                                                   | 1.97                                                   |
| M–C1    | 1.76                                                   | 1.79                                                   |
| C1–O1   | 1.17                                                   | 1.18                                                   |
| N1–M–C1 | 111                                                    | 115                                                    |
| N2–M–C1 | 138                                                    | 116                                                    |
| N1–M–N2 | 111                                                    | 129                                                    |

**Table S5.** Calculated energy differences  $\Delta E$  (kcal/mol) between high-spin- and low-spin- $[\mathbf{2}]^-$  obtained for three different functionals (with dispersion correction and Becke–Johnson damping).

| Functional | h.s.- $[\mathbf{2}]^-$ | l.s.- $[\mathbf{2}]^-$ |
|------------|------------------------|------------------------|
| B97-D      | 0.0                    | +6.5                   |
| PBE0       | 0.0                    | +17.9                  |
| B3-LYP     | 0.0                    | +13.4                  |

**Table S6.** Calculated absolute energies ( $H_e$ ) and reaction energies  $\Delta E$  (kcal/mol) according to Scheme 1 in the manuscript obtained for three different functionals (with dispersion correction and Becke–Johnson damping).

| Functional | $[\text{Co}(\text{hmds})_2]^-$       | CO          | $[\mathbf{1}]^-$       | $\Delta E$ |
|------------|--------------------------------------|-------------|------------------------|------------|
| B97-D      | -3130.11956                          | -113.293223 | -3243.46629            | -33.5      |
| PBE0       | -3128.50987                          | -113.232308 | -3241.78708            | -28.2      |
| B3-LYP     | -3129.39578                          | -113.31208  | -3242.74614            | -24.0      |
| Functional | h.s.- $[\text{Fe}(\text{hmds})_2]^-$ | CO          | h.s.- $[\mathbf{2}]^-$ | $\Delta E$ |
| B97-D      | -3010.9687                           | -113.293223 | -3124.31378            | -32.5      |
| PBE0       | -3009.45814                          | -113.232308 | -3122.73382            | -27.2      |
| B3-LYP     | -3010.33134                          | -113.31208  | -3123.68227            | -24.4      |
| Functional | l.s.- $[\text{Fe}(\text{hmds})_2]^-$ | CO          | l.s.- $[\mathbf{2}]^-$ | $\Delta E$ |
| B97-D      | -3010.92141                          | -113.293223 | -3124.30334            | -55.6      |
| PBE0       | -3009.41437                          | -113.232308 | -3122.70526            | -36.7      |
| B3-LYP     | -3010.29065                          | -113.31208  | -3123.66089            | -36.5      |

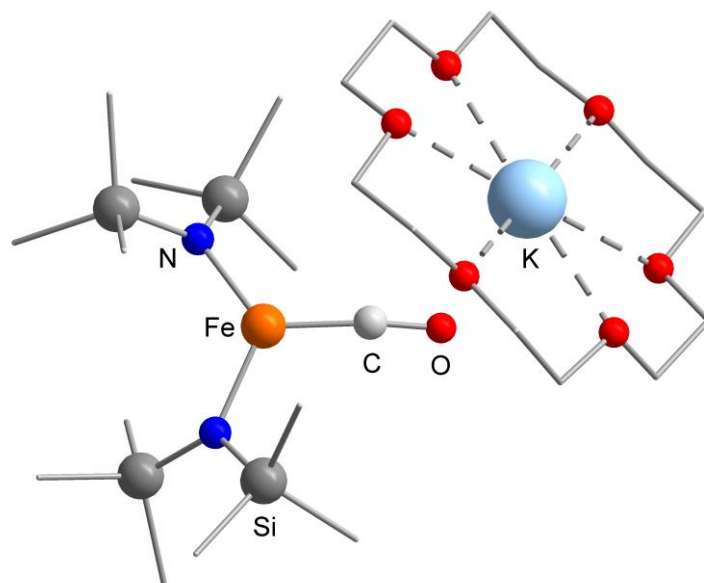

**Figure S16.** Computationally optimized molecular structure of  $\text{K}\{18\text{c}6\}[\mathbf{2}]$ . The bond lengths and angles are given in Table S4. H atoms are omitted for clarity. Note that after the geometry optimization the cation is slightly tilted compared to the experimentally obtained structure. This is likely due to packing effects in the crystal, which cannot be reproduced by the computational methods used here.

**Table S7.** Calculated bond lengths (Å) and angles (°) of  $\text{K}\{18\text{c}6\}[\mathbf{2}]$ .

|         | $\text{K}\{18\text{c}6\}[\mathbf{2}]$ |
|---------|---------------------------------------|
| M–N1    | 1.98                                  |
| M–N2    | 1.98                                  |
| M–C1    | 1.78                                  |
| C1–O1   | 1.19                                  |
| O–K     | 2.88                                  |
| N1–M–C1 | 116                                   |
| N2–M–C1 | 118                                   |
| N1–M–N2 | 121                                   |

## X-Ray diffraction analysis and molecular structures

**Table S8.** Crystal data and structure refinement for K{2.2.2crypt}[1].

|                                             |                                                                                  |
|---------------------------------------------|----------------------------------------------------------------------------------|
| Empirical formula                           | C <sub>31</sub> H <sub>72</sub> CoKN <sub>4</sub> O <sub>7</sub> Si <sub>4</sub> |
| Formula weight                              | 823.31                                                                           |
| Temperature/K                               | 100.0                                                                            |
| Crystal system                              | triclinic                                                                        |
| Space group                                 | P-1                                                                              |
| a/Å                                         | 12.5496(5)                                                                       |
| b/Å                                         | 13.9247(6)                                                                       |
| c/Å                                         | 15.1024(6)                                                                       |
| α/°                                         | 111.7110(10)                                                                     |
| β/°                                         | 92.9320(10)                                                                      |
| γ/°                                         | 108.9010(10)                                                                     |
| Volume/Å <sup>3</sup>                       | 2275.40(16)                                                                      |
| Z                                           | 2                                                                                |
| ρ <sub>calc</sub> /cm <sup>3</sup>          | 1.202                                                                            |
| μ/mm <sup>-1</sup>                          | 0.616                                                                            |
| F(000)                                      | 888.0                                                                            |
| Crystal size/mm <sup>3</sup>                | 0.416 × 0.13 × 0.117                                                             |
| Radiation                                   | MoKα (λ = 0.71073)                                                               |
| 2θ range for data collection/°              | 4.42 to 52.164                                                                   |
| Index ranges                                | -15 ≤ h ≤ 14, -17 ≤ k ≤ 17, -18 ≤ l ≤ 18                                         |
| Reflections collected                       | 41838                                                                            |
| Independent reflections                     | 9004 [R <sub>int</sub> = 0.0557, R <sub>sigma</sub> = 0.0422]                    |
| Data/restraints/parameters                  | 9004/0/445                                                                       |
| Goodness-of-fit on F <sup>2</sup>           | 1.026                                                                            |
| Final R indexes [I ≥ 2σ (I)]                | R <sub>1</sub> = 0.0382, wR <sub>2</sub> = 0.0810                                |
| Final R indexes [all data]                  | R <sub>1</sub> = 0.0593, wR <sub>2</sub> = 0.0881                                |
| Largest diff. peak/hole / e Å <sup>-3</sup> | 0.32/-0.43                                                                       |

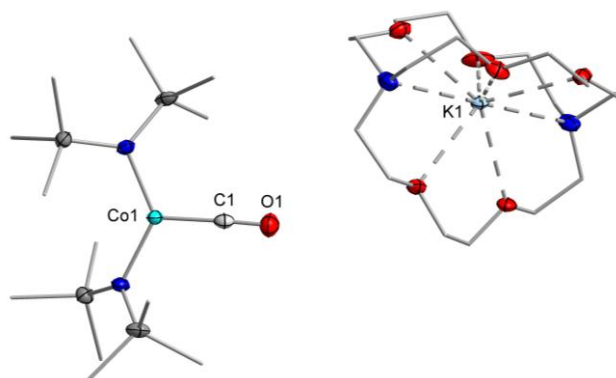

**Figure S17.** Molecular structure of K{2.2.2crypt}[1] within the crystal. Hydrogen atoms have been omitted for clarity.

**Table S9.** Crystal data and structure refinement for K{18c6}[2].

|                                             |                                                                                  |
|---------------------------------------------|----------------------------------------------------------------------------------|
| Empirical formula                           | C <sub>25</sub> H <sub>60</sub> FeKN <sub>2</sub> O <sub>7</sub> Si <sub>4</sub> |
| Formula weight                              | 708.06                                                                           |
| Temperature/K                               | 100.01                                                                           |
| Crystal system                              | monoclinic                                                                       |
| Space group                                 | P2 <sub>1</sub> /c                                                               |
| a/Å                                         | 8.6181(5)                                                                        |
| b/Å                                         | 19.9580(10)                                                                      |
| c/Å                                         | 23.1156(12)                                                                      |
| α/°                                         | 90                                                                               |
| β/°                                         | 90.923(2)                                                                        |
| γ/°                                         | 90                                                                               |
| Volume/Å <sup>3</sup>                       | 3975.4(4)                                                                        |
| Z                                           | 4                                                                                |
| ρ <sub>calc</sub> /cm <sup>3</sup>          | 1.183                                                                            |
| μ/mm <sup>-1</sup>                          | 0.641                                                                            |
| F(000)                                      | 1524.0                                                                           |
| Crystal size/mm <sup>3</sup>                | 0.475 × 0.211 × 0.114                                                            |
| Radiation                                   | MoKα (λ = 0.71073)                                                               |
| 2θ range for data collection/°              | 4.446 to 52.142                                                                  |
| Index ranges                                | -10 ≤ h ≤ 9, -24 ≤ k ≤ 24, -28 ≤ l ≤ 28                                          |
| Reflections collected                       | 29271                                                                            |
| Independent reflections                     | 7815 [R <sub>int</sub> = 0.0564, R <sub>sigma</sub> = 0.0524]                    |
| Data/restraints/parameters                  | 7815/0/373                                                                       |
| Goodness-of-fit on F <sup>2</sup>           | 1.023                                                                            |
| Final R indexes [I ≥ 2σ (I)]                | R <sub>1</sub> = 0.0328, wR <sub>2</sub> = 0.0638                                |
| Final R indexes [all data]                  | R <sub>1</sub> = 0.0528, wR <sub>2</sub> = 0.0695                                |
| Largest diff. peak/hole / e Å <sup>-3</sup> | 0.30/-0.28                                                                       |

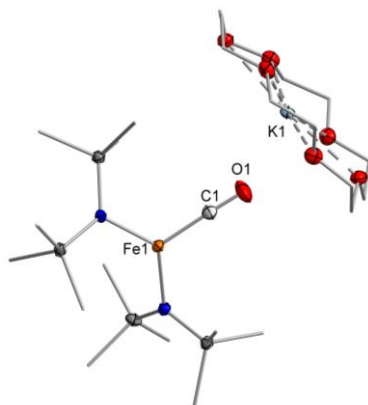

**Figure S18.** Molecular structure of K{18c6}[2] within the crystal. Hydrogen atoms have been omitted for clarity.

**Table S10.** Crystal data and structure refinement for K{18c6}[3].

|                                             |                                                               |
|---------------------------------------------|---------------------------------------------------------------|
| Empirical formula                           | C <sub>16</sub> H <sub>24</sub> CoKO <sub>10</sub>            |
| Formula weight                              | 474.43                                                        |
| Temperature/K                               | 100.0                                                         |
| Crystal system                              | trigonal                                                      |
| Space group                                 | R3                                                            |
| a/Å                                         | 13.8148(9)                                                    |
| b/Å                                         | 13.8148(9)                                                    |
| c/Å                                         | 9.9198(7)                                                     |
| α/°                                         | 90                                                            |
| β/°                                         | 90                                                            |
| γ/°                                         | 120                                                           |
| Volume/Å <sup>3</sup>                       | 1639.5(2)                                                     |
| Z                                           | 2.9997                                                        |
| ρ <sub>calc</sub> /cm <sup>3</sup>          | 1.441                                                         |
| μ/mm <sup>-1</sup>                          | 1.022                                                         |
| F(000)                                      | 738.0                                                         |
| Crystal size/mm <sup>3</sup>                | 0.306 × 0.216 × 0.118                                         |
| Radiation                                   | MoKα (λ = 0.71073)                                            |
| 2θ range for data collection/°              | 5.334 to 54.218                                               |
| Index ranges                                | -17 ≤ h ≤ 17, -17 ≤ k ≤ 17, -12 ≤ l ≤ 12                      |
| Reflections collected                       | 10135                                                         |
| Independent reflections                     | 1617 [R <sub>int</sub> = 0.0677, R <sub>sigma</sub> = 0.0475] |
| Data/restraints/parameters                  | 1617/1/86                                                     |
| Goodness-of-fit on F <sup>2</sup>           | 1.067                                                         |
| Final R indexes [I >= 2σ (I)]               | R <sub>1</sub> = 0.0357, wR <sub>2</sub> = 0.0779             |
| Final R indexes [all data]                  | R <sub>1</sub> = 0.0404, wR <sub>2</sub> = 0.0798             |
| Largest diff. peak/hole / e Å <sup>-3</sup> | 0.47/-0.20                                                    |
| Flack parameter                             | 0.40(3)*                                                      |

\* The structure was refined as a twin, twin ratio refined to 0.40(3).

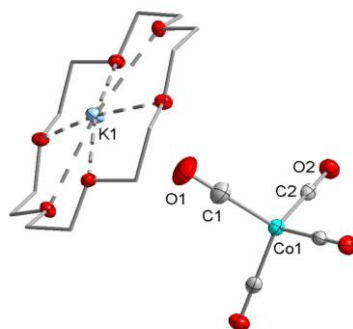

**Figure S19.** Molecular structure of K{18c6}[3] within the crystal. Hydrogen atoms have been omitted for clarity.



## References

- [1] G. A. Bain, J. F. Berry, *J. Chem. Educ.* **2008**, *85*, 532–536.
